# Supplementary material for: Maintenance of dominant populations in heavily grazed grassland: Inference from a Stipa breviflora seed germination experiment
Source: PeerJ. 2019 Mar 21;7:e6654. doi: 10.7717/peerj.6654 (PMC6431537; doi:10.7717/peerj.6654)
Supplement: Supplemental Information 1 [file peerj-07-6654-s001.xlsx]

## Sheet: Seed phenotypic characteristics
Grazing treatment	Repeat	Seed length (mm)	Seed width (mm)	Seed weight (mg)	Awn weight (mg)
HG	1	5.63	0.626	1.2	1.2
	2	6.81	0.443	1.6	1
	3	5.64	0.729	1.8	0.8
	4	5.76	0.623	1	1.3
	5	5.5	0.653	1.4	0.7
	6	5.86	0.447	0.6	1
	7	6.35	0.689	1.5	1.2
	8	5.8	0.704	1.5	1.2
	9	6.07	0.427	0.7	0.8
	10	5.77	0.408	0.5	0.8
	11	5.16	0.377	0.1	0.8
	12	5.36	0.628	1.1	0.7
	13	5.88	0.699	1.6	1
	14	5.96	0.711	1.5	1.3
	15	5.68	0.529	1.1	0.7
	16	6.55	0.683	1.5	1.4
	17	5.57	0.484	0.9	1
	18	5.51	0.507	0.7	0.8
	19	6.58	0.424	0.9	0.9
	20	6.35	0.73	1.9	1.4
	21	6.41	0.671	1.5	1.1
	22	5.39	0.573	1	0.5
	23	6.72	0.449	0.7	1.5
	24	5.61	0.625	1.4	0.9
	25	5.86	0.604	1.4	0.3
	26	6.15	0.571	1.1	1
	27	5.75	0.587	1.2	0.8
	28	5.47	0.559	1.4	0.8
	29	5.35	0.636	1.1	1.2
	30	5.8	0.521	1	0.8
	31	5.77	0.598	0.8	1.2
	32	6.72	0.639	1.3	1.3
	33	6.17	0.641	1.8	1
	34	5.89	0.56	1.1	0.9
	35	6.08	0.621	1.3	0.7
	36	6.65	0.699	1.4	1.4
	37	5.83	0.543	1.3	0.6
	38	6.18	0.506	1.4	0.7
	39	5.9	0.654	1.1	1.3
	40	6.38	0.61	1.4	0.7
	41	5.43	0.698	1.4	0.7
	42	6.07	0.652	1.3	1.1
	43	6.11	0.496	1	1.3
	44	5.28	0.568	1.1	0.9
	45	5.92	0.644	1.3	0.9
	46	6.01	0.612	1.2	0.9
	47	6.15	0.708	1.6	0.7
	48	5.99	0.675	1.3	1.5
	49	5.56	0.676	1	1.5
	50	6.41	0.673	1.8	1.5
NG	1	6.47	0.706	1.9	2.5
	2	5.95	0.625	1.5	2.2
	3	6.97	0.713	1.6	1.5
	4	6.62	0.708	1.8	1.6
	5	6.45	0.685	1.6	1.6
	6	6.51	0.666	1.6	1.4
	7	7.35	0.809	2.3	1.9
	8	7.01	0.779	2.1	1.8
	9	6.44	0.718	1.8	1.6
	10	7.23	0.656	1.7	1.3
	11	6.57	0.676	1.8	1.4
	12	6.08	0.681	1.7	1.6
	13	6.57	0.658	1.7	1.1
	14	6.48	0.66	1.8	0.8
	15	5.82	0.644	1.5	1.1
	16	7	0.741	2.2	1.8
	17	7.23	0.662	2	0.9
	18	6.2	0.726	1.7	1.2
	19	6.42	0.693	1.8	1.2
	20	6.3	0.61	1.2	0.8
	21	6.66	0.714	1.9	1.4
	22	6.92	0.742	1.9	1.2
	23	6.55	0.632	1.6	1.3
	24	6.16	0.606	1.3	1.2
	25	6.68	0.472	0.9	1.9
	26	6.52	0.738	1.7	1.3
	27	6.08	0.658	1.5	1.7
	28	6.46	0.711	1.4	1.3
	29	6.68	0.603	1.3	1.1
	30	6.68	0.685	1.8	1.6
	31	6.83	0.739	1.9	1.4
	32	6.07	0.634	1.4	1.2
	33	6.31	0.735	1.8	1
	34	7.02	0.707	1.8	1.5
	35	6.77	0.74	1.6	1.4
	36	7.01	0.69	1.6	1.7
	37	5.59	0.636	1.3	1.2
	38	6.2	0.742	2.1	1.4
	39	6.53	0.588	1.2	1.5
	40	7.04	0.666	1.7	1.3
	41	6.63	0.495	0.6	1.2
	42	6.83	0.787	2.3	2.1
	43	6.43	0.731	1.8	1.6
	44	6.57	0.716	1.8	1.1
	45	6.69	0.649	1.5	1.5
	46	5.93	0.606	1.1	1.4
	47	6.02	0.621	1.3	1
	48	6.43	0.741	1.8	1.3
	49	6.62	0.51	1.3	1
	50	7.3	0.73	2.2	1.4

## Sheet: Seed germination
Seed germination test 1						Seed germination test 2						Seed germination test 3						Seed germination test 4
Grazing treatment	Seed treatment	Repeat	Germination number	Germination rate (%)		Grazing treatment	Seed treatment	Repeat	Germination number	Germination rate (%)			Seed treatment	Repeat	Germination number	Germination rate (%)		Seed treatment	Repeat	Germination number	Germination rate (%)
HG	with awn	1	13	26		HG	with awn	1	29	58		Seed in HG	with seeds of NG (Additive)	1	34	68		CK	1	43	86
		2	31	62				2	33	66				2	27	54			2	43	86
		3	37	74				3	33	66				3	24	48			3	42	84
		4	25	50				4	28	56				4	35	70			4	42	84
		5	25	50				5	27	54				5	21	42			5	42	84
	without awn	1	44	88			without awn	1	36	36			with awns of NG (Additive)	1	15	30		with seeds of HG (Additive)	1	45	90
		2	29	58				2	35	35				2	12	24			2	46	92
		3	34	68				3	30	30				3	15	30			3	48	96
		4	28	56				4	37	37				4	9	18			4	43	86
		5	26	52				5	33	33				5	11	22			5	44	88
NG	with awn	1	5	10		NG	with awn	1	7	14			with awn+seeds of NG (Additive)	1	20	40		with awns of HG (Additive)	1	33	66
		2	1	2				2	4	8				2	17	34			2	36	72
		3	6	12				3	8	16				3	15	30			3	29	58
		4	7	14				4	5	10				4	10	20			4	39	78
		5	4	8				5	6	12				5	18	36			5	28	56
	without awn	1	23	46			without awn	1	30	60		Seed in NG	with seeds of HG (Additive)	1	22	44		with awn+seeds of HG (Additive)	1	36	72
		2	32	64				2	27	54				2	33	66			2	35	70
		3	23	46				3	38	76				3	30	60			3	36	72
		4	15	30				4	30	60				4	26	52			4	45	90
		5	19	38				5	26	52				5	25	50			5	33	66
													with awns of HG (Additive)	1	25	50		with seeds of NG (Additive)	1	43	86
														2	17	34			2	43	86
														3	22	44			3	45	90
														4	17	34			4	45	90
														5	19	38			5	43	86
													with awn+seeds of HG (Additive)	1	26	52		with awns of NG (Additive)	1	12	24
														2	29	58			2	18	36
														3	24	48			3	22	44
														4	22	44			4	17	34
														5	21	42			5	15	30
																		with awn+seeds of NG (Additive)	1	28	56
																			2	27	54
																			3	22	44
																			4	25	50
																			5	26	52

## Sheet: 2010-2017
		2010		2011		2012		2013		2014		2015		2016		2017
Grazing treatment	Repeat	Density of Stipa breviflora (individual m-2)	Density of communication (individual m-2)	Density of Stipa breviflora (individual m-2)	Density of communication (individual m-2)	Density of Stipa breviflora (individual m-2)	Density of communication (individual m-2)	Density of Stipa breviflora (individual m-2)	Density of communication (individual m-2)	Density of Stipa breviflora (individual m-2)	Density of communication (individual m-2)	Density of Stipa breviflora (individual m-2)	Density of communication (individual m-2)	Density of Stipa breviflora (individual m-2)	Density of communication (individual m-2)	Density of Stipa breviflora (individual m-2)	Density of communication (individual m-2)
HG1	1	5	61	4	86	5	104	10	132	4	43	7	286	9	231	10	37
	2	7	69	8	76	5	57	18	52	1	35	7	268	17	230	3	56
	3	3	58	2	72	5	66	22	94	4	76	4	192	12	191	6	59
	4	2	70	3	65	3	65	8	92	3	49	3	208	14	165	4	65
	5	1	46	1	56	4	69	10	37	4	59	4	101	12	199	4	43
HG2	1	2	66	1	87	2	101	1	177	8	28	5	37	16	229	3	87
	2	7	67	5	122	7	73	16	157	9	23	7	116	7	197	6	84
	3	6	75	3	88	14	158	33	159	11	50	10	261	10	174	5	87
	4	5	51	4	87	6	100	16	103	6	66	3	57	5	159	4	131
	5	9	72	5	83	9	77	8	140	5	25	5	41	11	200	12	111
HG3	1	7	75	5	143	11	56	6	115	3	50	7	62	15	153	2	84
	2	8	64	9	165	9	72	17	163	7	36	16	61	3	106	5	64
	3	5	59	6	157	10	60	12	122	7	70	10	106	9	145	7	54
	4	2	72	5	109	9	29	13	167	4	49	13	83	9	156	5	107
	5	9	66	8	100	9	68	11	164	6	8	4	81	6	290	4	65
NG1	1	8	71	4	129	6	126	24	157	5	54	13	73	14	216	21	155
	2	1	58	9	98	7	116	16	168	8	60	26	51	21	107	16	82
	3	1	63	6	111	6	111	15	136	16	63	38	59	17	86	15	57
	4	4	35	1	90	1	114	5	68	18	63	11	41	10	73	16	48
	5	1	90	2	112	3	77	3	46	27	66	25	61	27	90	14	50
NG2	1	5	70	3	82	1	55	5	61	31	50	19	72	14	124	13	49
	2	3	50	3	141	2	100	3	28	18	39	14	138	12	90	26	57
	3	7	68	3	97	3	86	5	56	16	43	16	58	17	88	23	47
	4	10	136	1	101	2	53	6	70	17	41	17	87	19	57	11	54
	5	2	128	10	186	9	43	8	75	16	37	3	86	18	101	13	84
NG3	1	7	41	6	193	17	48	7	80	16	39	10	106	19	151	9	39
	2	9	25	10	218	6	61	13	66	8	38	4	71	16	88	14	37
	3	7	47	9	112	8	54	9	74	11	59	6	77	22	147	19	35
	4	3	47	10	41	1	93	3	63	11	25	11	58	19	146	7	51
	5	2	54	5	48	1	68	5	84	21	45	7	116	30	98	13	48

## Sheet: 2015-2017
			Density of Stipa breviflora under different growth stages (individual m-2)					Density of plant communication (individual m-2)
Year	Grazing treatment	Repeat	Ageing phase	Pre-aging phase	Adult phase	Young phase	Seedling phase
2015	HG1	1	0	0	0	5	0	17
		2	0	0	6	2	2	22
		3	0	0	3	5	0	9
		4	0	2	0	5	5	12
		5	0	0	3	4	6	21
	HG2	1	0	1	3	1	0	13
		2	0	2	7	2	8	26
		3	0	0	3	4	3	18
		4	0	0	3	3	0	8
		5	0	0	3	4	4	27
	HG3	1	0	0	0	0	0	36
		2	0	1	5	0	0	43
		3	0	2	0	1	0	19
		4	0	0	1	4	0	24
		5	0	0	0	1	1	21
	NG1	1	5	2	2	2	2	20
		2	0	2	3	2	4	16
		3	0	2	0	2	3	15
		4	0	3	0	2	2	17
		5	0	5	4	6	3	25
	NG2	1	0	2	2	7	5	23
		2	0	0	0	3	3	13
		3	0	0	8	3	4	21
		4	0	0	0	0	2	8
		5	0	0	0	0	3	7
	NG3	1	0	0	0	0	2	13
		2	0	0	0	2	3	15
		3	0	0	0	3	3	15
		4	0	0	0	0	4	8
		5	0	0	0	2	4	16
2016	HG1	1	3	3	5	4	3	210
		2	8	3	6	9	2	168
		3	10	8	14	7	3	230
		4	4	1	12	3	4	265
		5	8	5	20	9	8	297
	HG2	1	2	3	5	4	2	253
		2	1	2	4	2	1	210
		3	2	4	2	1	1	203
		4	8	5	7	1	3	255
		5	4	7	6	3	2	295
	HG3	1	0	0	1	0	0	190
		2	0	1	3	0	0	164
		3	0	1	3	1	0	165
		4	1	2	2	1	0	148
		5	2	1	1	1	0	159
	NG1	1	3	7	8	4	0	220
		2	8	3	6	3	2	164
		3	5	4	4	8	0	171
		4	5	6	4	3	1	189
		5	6	10	3	3	0	131
	NG2	1	10	3	1	0	0	323
		2	12	1	2	0	1	254
		3	9	5	7	4	0	376
		4	15	3	2	1	1	341
		5	16	1	2	7	1	385
	NG3	1	23	19	18	4	2	198
		2	50	19	19	4	1	231
		3	69	20	27	3	2	320
		4	72	20	17	4	0	253
		5	70	21	22	2	2	301
2017	HG1	1	4	4	4	2	0	74
		2	5	2	13	2	1	72
		3	3	3	10	3	0	84
		4	2	9	12	2	2	86
		5	5	4	4	9	0	66
	HG2	1	5	14	0	0	0	121
		2	13	2	4	0	0	108
		3	5	10	0	0	0	86
		4	10	4	3	0	0	91
		5	3	5	1	0	0	111
	HG3	1	1	8	1	0	0	79
		2	2	6	3	0	0	76
		3	2	2	1	0	0	56
		4	3	3	1	0	0	50
		5	0	4	2	0	0	56
	NG1	1	8	2	1	0	0	174
		2	11	3	1	2	1	207
		3	10	0	3	5	1	188
		4	14	3	4	1	1	171
		5	6	2	0	6	1	102
	NG2	1	2	4	7	3	1	102
		2	5	3	1	11	2	90
		3	3	9	2	1	0	96
		4	3	6	3	4	1	80
		5	5	3	7	0	0	74
	NG3	1	2	27	1	2	0	57
		2	0	18	1	1	0	52
		3	3	28	0	0	0	51
		4	8	37	7	0	0	84
		5	14	42	1	0	0	99

## Sheet:  precipitation
Year	May-July precipitation (mm)
2010	65
2011	51.4
2012	228
2013	133
2014	51.7
2015	99.4
2016	122
2017	99.1
